# Supplementary material for: KEAP1 Is Required for Artesunate Anticancer Activity in Non-Small-Cell Lung Cancer
Source: MDPI journal article supplement (doi:10.3390/cancers13081885), 2021-04-14
Supplement: s1 [file s1]

Uncropped Western blots for Figure 3

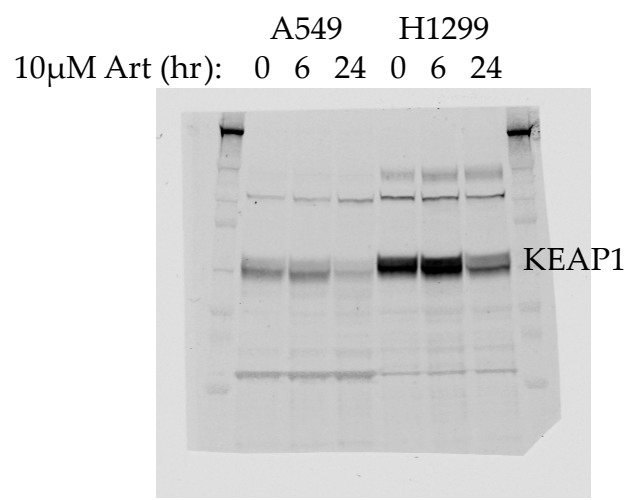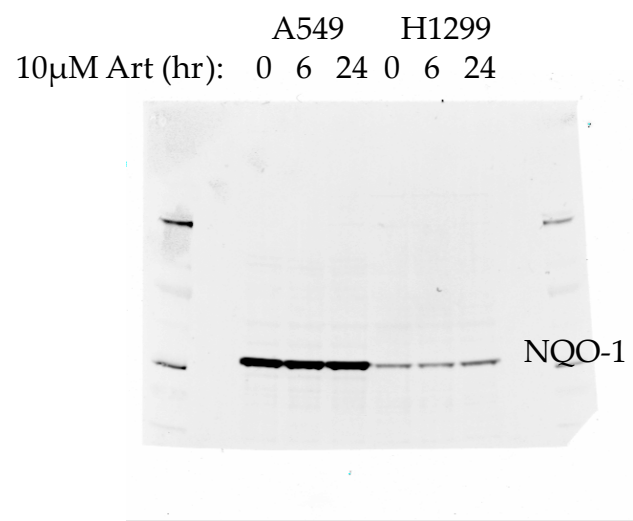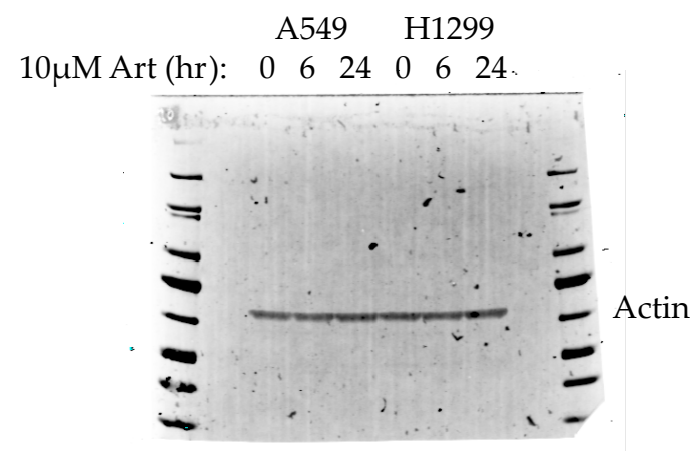

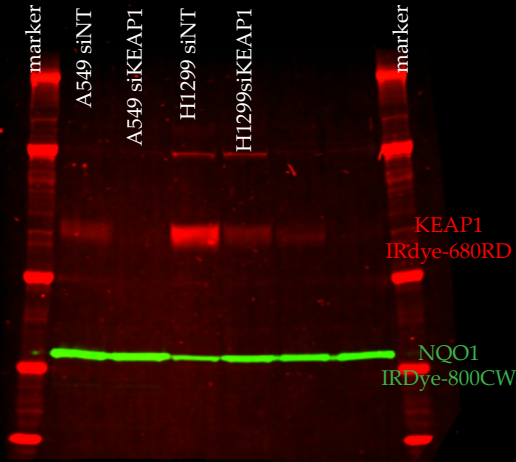

Uncropped Western blot for figure 4a

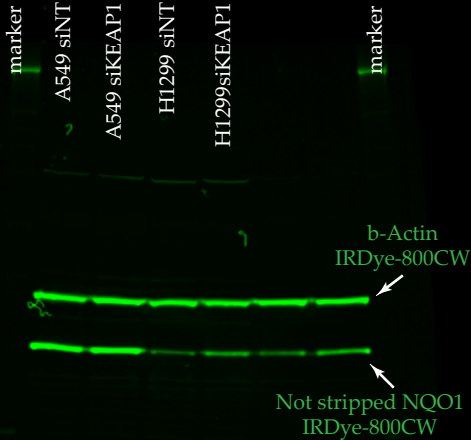

Uncropped Western blot for figure 4a
