# Supplementary material for: KEAP1 Is Required for Artesunate Anticancer Activity in Non-Small-Cell Lung Cancer
Source: MDPI journal article supplement (doi:10.3390/cancers13081885), 2021-04-14
Supplement: s1 [file s1]

(a) A549

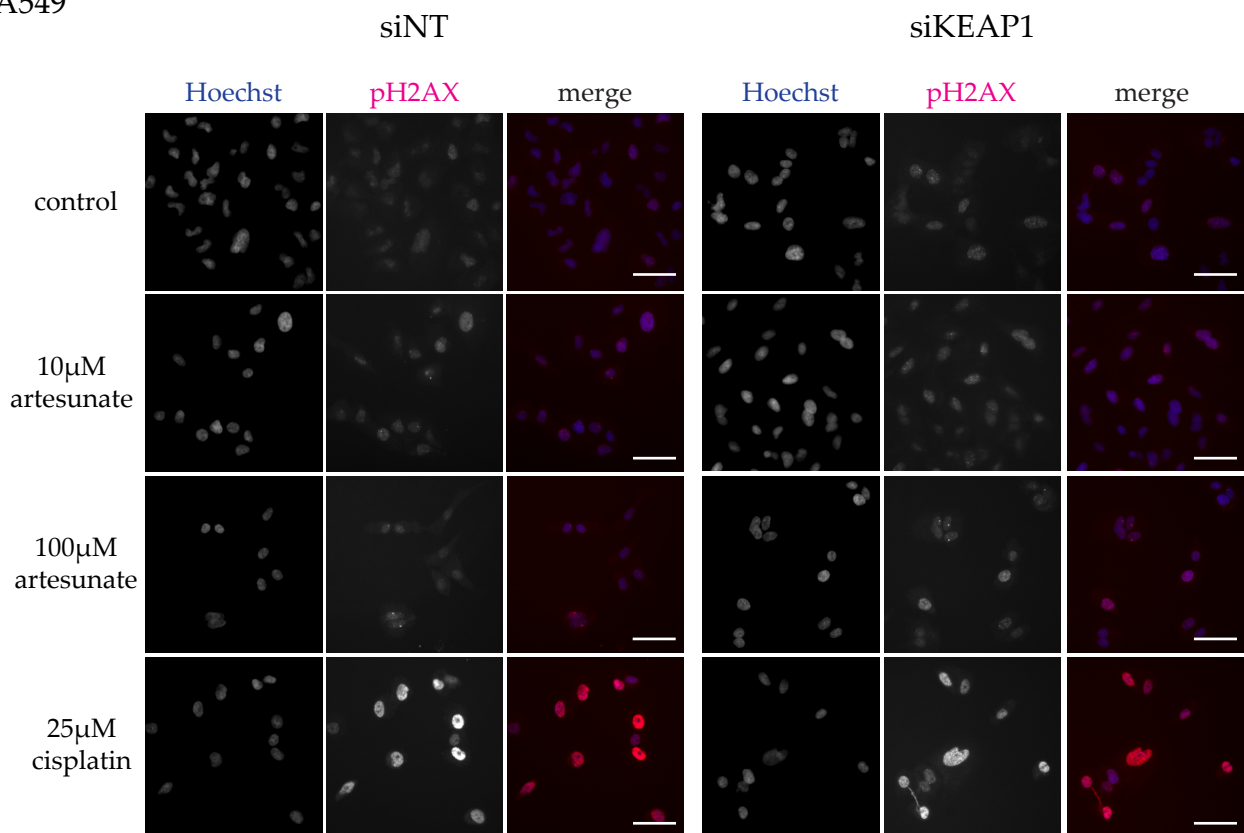

(b) H1299

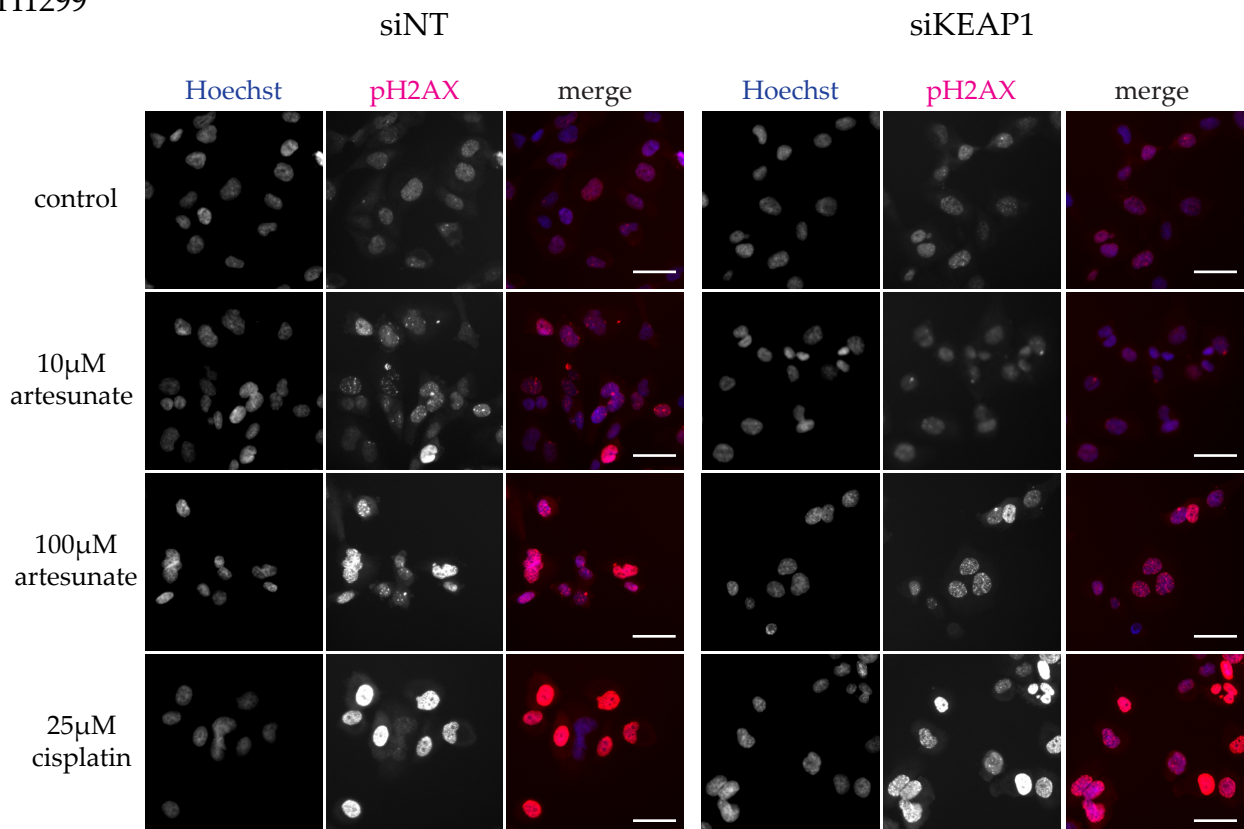

**Supplemental Figure 1:** Representative images of pH2AX staining in A549 (a) and H1299 cells (b) that had been transfected with non-targeting (siNT) or KEAP1 (siKEAP1) specific siRNA following 24 hour treatment with 0.1% DMSO (control), 10 $\mu$ M artesunate, 100 $\mu$ M artesunate, or 25 $\mu$ M cisplatin (bar = 50  $\mu$ m).

(a)

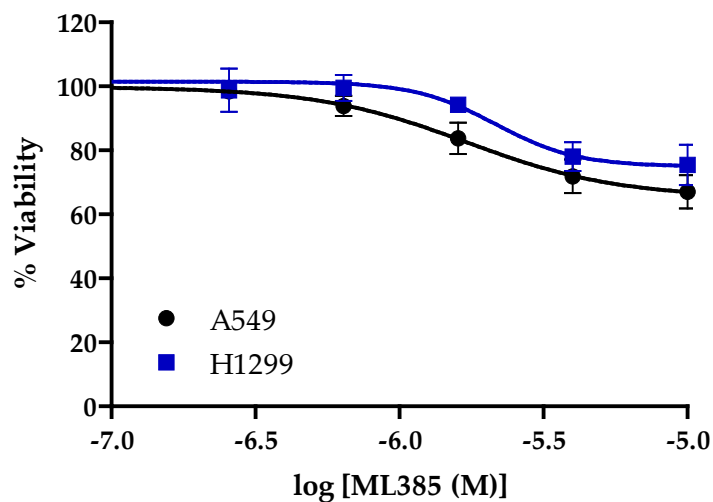

(b)

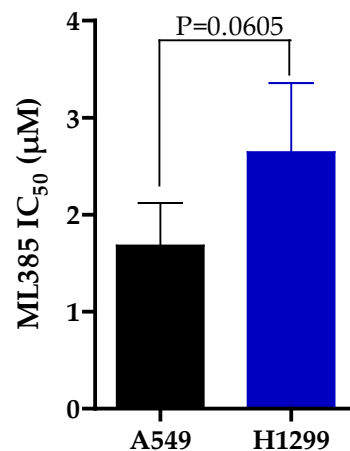

**Supplemental Figure 2:** ML385 (NRF2 inhibitor) has minimal effect of viability of A549 and H1299 NSCLC cell lines as a single agent (a) Cells were treated with a serially diluted concentrations of ML385 for 96hr. Each cell lines was normalized to cells treated with 0.1% DMSO as a control and is graphed as the mean  $\pm$  SD,  $n=4$ . (b) The mean IC<sub>50</sub> of ML385 in each cell line is graphed  $\pm$  SD. P-value was calculated using a two-tailed t-test comparing the mean IC<sub>50</sub> for each cell line tested.



(a) A549

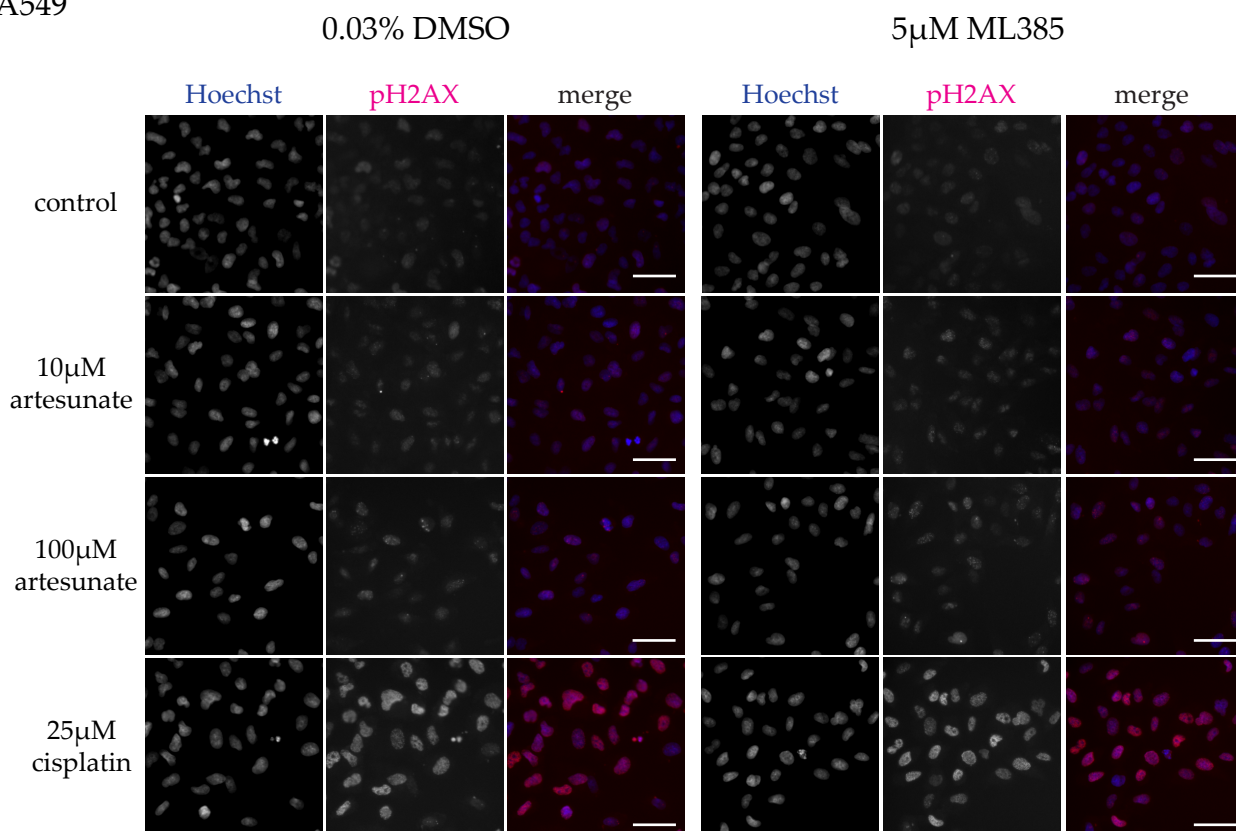

(b) H1299

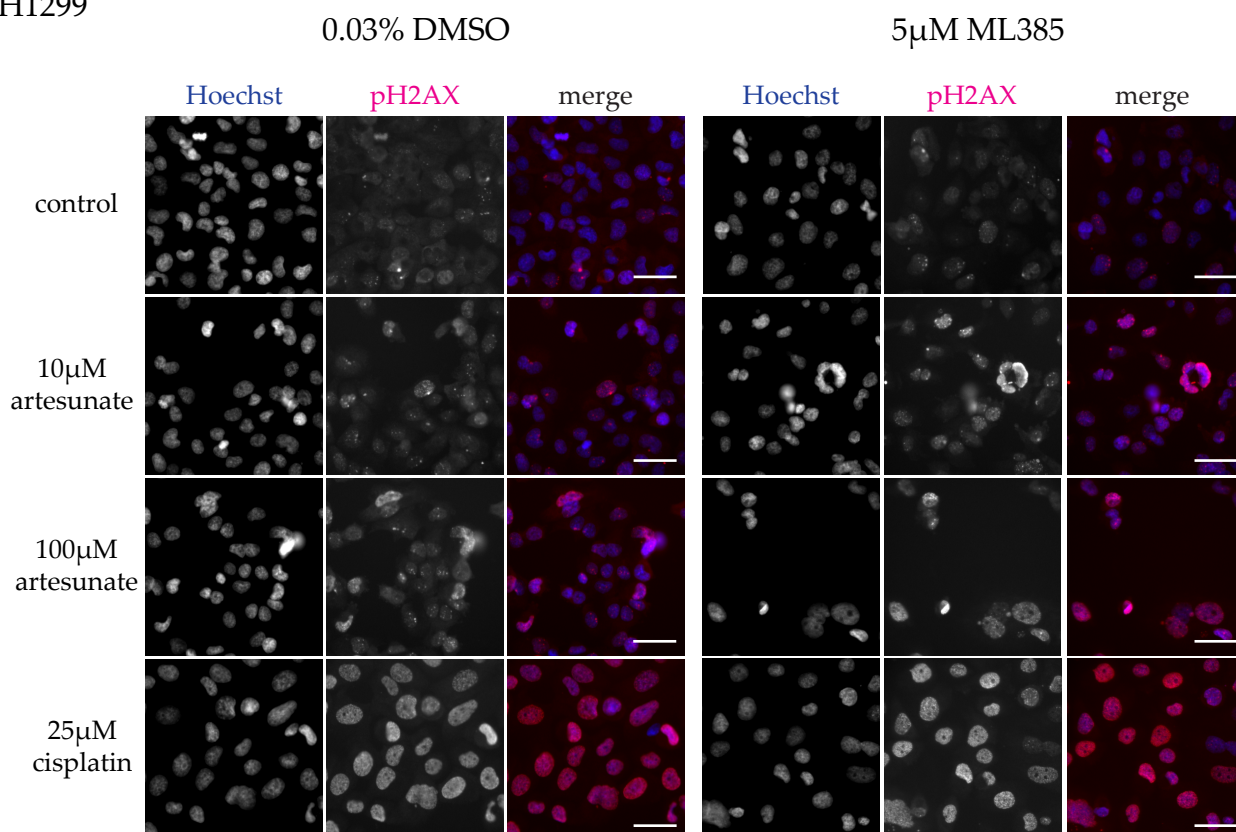

**Supplemental Figure 3:** Representative images of pH2AX staining in A549 (a) and H1299 cells (b) that had been treated with 0.03% DMSO or 5 $\mu$ M ML385 for 24 hour prior to treatment with 0.1% DMSO (control), 10 $\mu$ M artesunate, 100 $\mu$ M artesunate, or 25 $\mu$ M cisplatin for 24 hours (bar = 50  $\mu$ m).

(a)

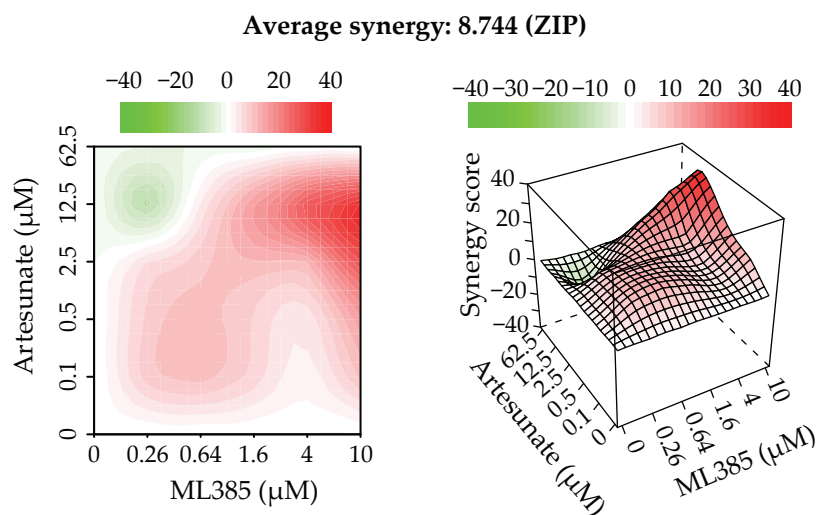

(b)

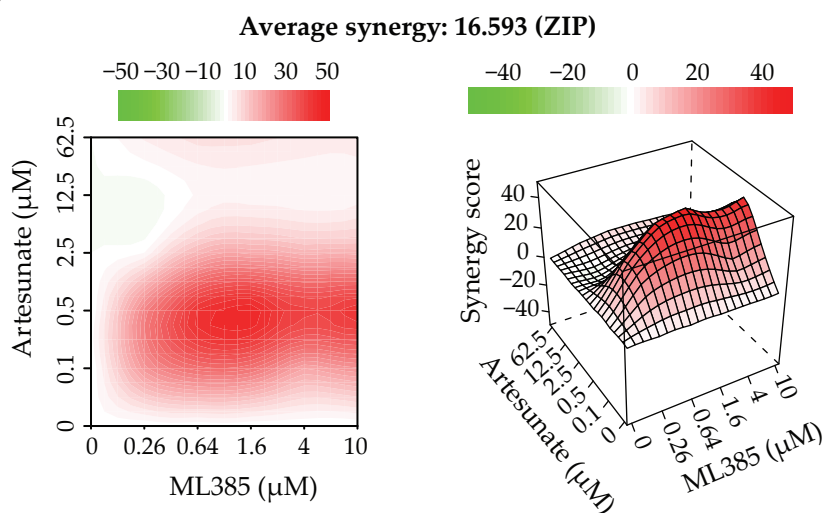

**Supplemental Figure 4:** ZIP model demonstrating synergy between artesunate and ML385

Graphic representation of the ZIP model of synergy scoring as calculated by using a 6x6 dose-response matrix in A549 (a) and H1299 (b) cells. Red color indicates synergy, while green indicates antagonism between the drug combinations tested.
